# Supplementary material for: Separation of methylmercury from biological samples for stable isotopic analysis
Source: Royal Society of Chemistry journal article supplement (doi:10.1039/d1ja00236h), 2021-01-01
Supplement: d1ja00236h1.pdf [file d1ja00236h1.pdf]

Supporting Information for

**Separation of methylmercury from biological samples for stable isotopic analysis**

Wei Zhang<sup>a,b,1</sup>, Guangyi Sun<sup>a,1</sup>, Runsheng Yin<sup>c</sup>, Xinbin Feng<sup>a,d\*</sup>, Zuxiu Yao<sup>a,b</sup>, Xuewu Fu<sup>a</sup>, and Lihai Shang<sup>a,\*</sup>

<sup>a</sup> State Key Laboratory of Environmental Geochemistry, Institute of Geochemistry, Chinese Academy of Sciences, Guiyang 550081, China

<sup>b</sup> University of Chinese Academy of Sciences, Beijing, 100049, China

<sup>c</sup> State Key Laboratory of Ore Deposit Geochemistry, Institute of Geochemistry, Chinese Academy of Sciences, Guiyang 550081, China

<sup>d</sup> CAS Center for Excellence in Quaternary Science and Global Change, Xi'an, 710061, China

<sup>1</sup>These authors contributed equally to this work report

**Table S1.** Parameters of Nu-Plasma MC-ICP-MS and sample introduction systems

| <b>plasma parameters</b>                     |                                |
|----------------------------------------------|--------------------------------|
| Nebulizer Ar flow rate                       | 20 ~ 25 psi                    |
| mix gas                                      | 0.06 ~ 0.15 mL/min             |
| RF power                                     | 1300 W                         |
| <b>Aridus II desolvator</b>                  |                                |
| T of the spray chamber                       | 110 °C                         |
| T of the desolator                           | 160 °C                         |
| Sensitivity for <sup>205</sup> Tl            | 0.2 ~ 0.4 V ppb <sup>-1</sup>  |
| <b>Custom-made hydride generation system</b> |                                |
| solution uptake rate                         | 0.8~ 1.2 mL/min                |
| Sensitivity for <sup>202</sup> Hg            | 2.2 ~ 3. 4 V ppb <sup>-1</sup> |

**Table S2.** MeHg isotopic composition for stock solution and mixed standard solution separated with our new method in this study. The 1:1, 3:7 and 1:9 represent the ratio of MeHg/IHg (NIST-3133) in the mixed standard solution.

| Sample type                       | description      | n | $\delta^{199}\text{MeHg}$<br>(‰) | 2SD<br>(‰) | $\delta^{200}\text{MeHg}$<br>(‰) | 2SD<br>(‰) | $\delta^{201}\text{MeHg}$<br>(‰) | 2SD<br>(‰) | $\delta^{202}\text{MeHg}$<br>(‰) | 2SD<br>(‰) | $\Delta^{199}\text{MeHg}$<br>(‰) | 2SD<br>(‰) | $\Delta^{200}\text{MeHg}$<br>(‰) | 2SD<br>(‰) | $\Delta^{201}\text{MeHg}$<br>(‰) | 2SD<br>(‰) | MeHg<br>Recovery<br>% |
|-----------------------------------|------------------|---|----------------------------------|------------|----------------------------------|------------|----------------------------------|------------|----------------------------------|------------|----------------------------------|------------|----------------------------------|------------|----------------------------------|------------|-----------------------|
| MeHg<br>stock solution            | MeHg             | 3 | -0.17                            | 0.06       | -0.27                            | 0.14       | -0.50                            | 0.10       | -0.58                            | 0.13       | -0.03                            | 0.03       | 0.02                             | 0.08       | -0.04                            | 0.03       | 102±1                 |
|                                   | MeHg:IHg<br>=1:1 | 3 | -0.13                            | 0.05       | -0.28                            | 0.07       | -0.51                            | 0.14       | -0.56                            | 0.11       | 0.01                             | 0.06       | 0.00                             | 0.02       | -0.04                            | 0.08       | 103±8                 |
| MeHg and<br>IHg mixed<br>solution | MeHg:IHg<br>=3:7 | 3 | -0.08                            | 0.03       | -0.27                            | 0.01       | -0.53                            | 0.12       | -0.55                            | 0.08       | 0.06                             | 0.04       | 0.01                             | 0.04       | 0.05                             | 0.09       | 103±2                 |
|                                   | MeHg:IHg<br>=1:9 | 3 | -0.20                            | 0.04       | -0.32                            | 0.07       | -0.50                            | 0.03       | -0.62                            | 0.09       | -0.05                            | 0.04       | -0.01                            | 0.03       | -0.07                            | 0.04       | 107±3                 |

**Table S3.** MeHg isotopic composition characteristics separated by toluene extraction method (TEM) according to *Masbou, et al (2013)*.

|                                  | Samples      | N | $\delta^{202}\text{MeHg}$<br>(‰) | 2SD<br>(‰) | $\Delta^{199}\text{MeHg}$<br>(‰) | 2SD<br>(‰) | $\Delta^{200}\text{MeHg}$<br>(‰) | 2SD<br>(‰) | $\Delta^{201}\text{MeHg}$<br>(‰) | 2SD<br>(‰) | MeHg Recovery<br>% |
|----------------------------------|--------------|---|----------------------------------|------------|----------------------------------|------------|----------------------------------|------------|----------------------------------|------------|--------------------|
| CRMs                             | BCR-414      | 3 | -0.05                            | 0.09       | 1.16                             | 0.01       | 0.19                             | 0.53       | 0.84                             | 0.05       | 87±7               |
|                                  | ERM-CE-464   | 4 | 0.65                             | 0.07       | 2.24                             | 0.16       | 0.07                             | 0.04       | 1.85                             | 0.13       | 110±6              |
|                                  | DORM-4       | 3 | 0.62                             | 0.12       | 1.69                             | 0.18       | 0.04                             | 0.07       | 1.38                             | 0.15       | 68±4               |
|                                  | DOLT-5       | 3 | 0.52                             | 0.06       | 0.89                             | 0.17       | 0.06                             | 0.03       | 0.73                             | 0.19       | 100±7              |
|                                  | SRM-1946     | 3 | 1.14                             | 0.14       | 7.15                             | 0.13       | 0.09                             | 0.07       | 5.54                             | 0.10       | 89±6               |
| Natural<br>biological<br>samples | Bighead carp | 2 | -0.27                            | -0.14      | 1.04                             | -0.04      | 0.06                             | -0.04      | 0.86                             | -0.14      | 108±9              |
|                                  | Lobster      | 3 | -0.80                            | -0.07      | 0.57                             | -0.02      | -0.01                            | -0.04      | 0.38                             | -0.06      | 102±9              |
|                                  | Silver carp  | 2 | -0.12                            | -0.20      | 1.34                             | -0.01      | -0.01                            | -0.01      | 1.03                             | -0.09      | 111±6              |

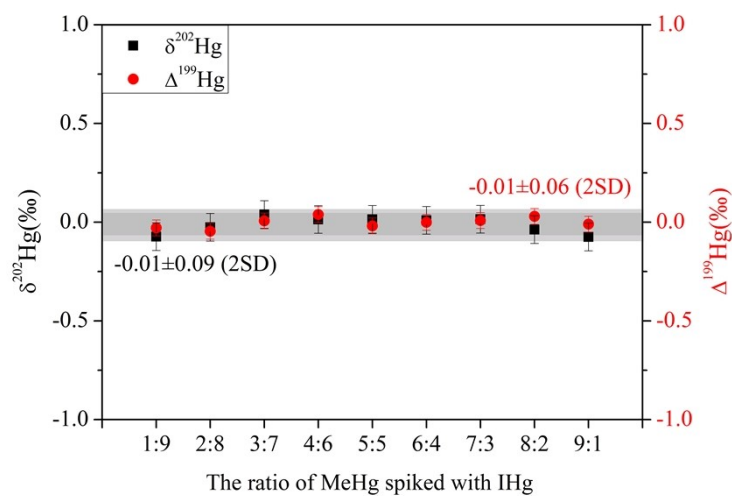

**Figure S1.** The isotopic composition of NIST-3133 directly analyzed using Nu-Plasma II MC-ICP-MS at different MeHg/IHg ratios. Error bars represent 2SD of the measurement of Hg isotope.

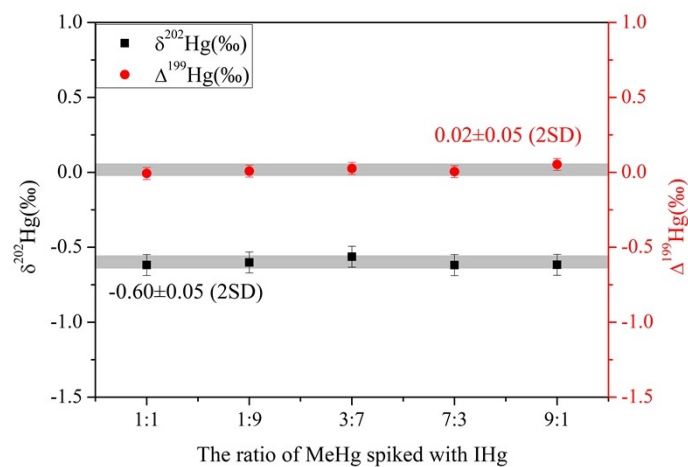

**Figure S2.** The isotopic composition of NIST-3177 directly analyzed using Nu-Plasma II MC-ICP-MS at different MeHg/IHg ratios. Error bars represent 2SD of the measurement of Hg isotope.
